# Supplementary material for: Expected goals in football: Improving model performance and demonstrating value
Source: PubMed Central journal article supplement (PMC10075453; doi:10.1371/journal.pone.0282295), 2023-04-05
Supplement: pone.0282295.s001.pdf [file pone.0282295.s001.pdf]

**S1 Table. Overview of features included in expected goals models** The first 4 features are categorical features taking the values listed, the rest are numerical values in the ranges shown.

| Feature                    | Values                                 | Description                                                                                                  |
|----------------------------|----------------------------------------|--------------------------------------------------------------------------------------------------------------|
| Side                       | Home, Away                             | Whether the player taking the shot is playing at home or away                                                |
| Body Part                  | Head/Body, Strong/Weak Foot            | What part of the body is used to take the shot                                                               |
| Match Situation            | Open Play, Counter, Free Kick, Penalty | Which type of situation the shot occurs in                                                                   |
| Position                   | Defender, Midfielder, Forward          | What position the shot-taker plays in                                                                        |
| Gameweek                   | [1, 38]                                | How far through the season the match in which the shot occurs is played                                      |
| Time of shot               | [1, 6190]                              | The second of the match in which the shot occurs                                                             |
| Goal Difference            | [-8, 8]                                | How many goals the shot-taker's team is leading or losing by                                                 |
| Length of Possession       | [0, 398]                               | The length of time (in seconds) the shot-taker's team has sole possession of the ball before the shot occurs |
| Age                        | [15, 41]                               | The age of the shot-taker on matchday                                                                        |
| Distance                   | [1, 101]                               | The Euclidean distance from the centre of the goal line at which the shot is taken                           |
| Angle                      | [0, 180]                               | The angle (in degrees) between the left side of the goal line and the location at which the shot is taken    |
| Current Rank               | [1, 20]                                | The league position the shot-taker's team occupies before the match is played                                |
| Previous Season Ranking    | [0, 20]                                | The league position the shot-taker's team finished at the end of the previous season                         |
| Player Value               | [0, 180000000]                         | The shot-taker's Transfermarkt value                                                                         |
| Average Transfer Spend     | [0, 107100000]                         | The average summer transfer fee per player (including loan fees) of the shot-taker's team                    |
| Cumulative PlayeRank Score | [-0.6, 1.7]                            | The shot-taker's cumulative PlayeRank value at time of match                                                 |
| Match Attendance           | [0, 97939]                             | The attendance figure at the match in which the shot is taken                                                |
| Match Importance           | [0, 1]                                 | How important the result of the match is to the shot-taker's team                                            |
| Team Form                  | [0, 1]                                 | How the shot-taker's team has been performing in recent matches                                              |
| Elo Rating                 | [§114, 2088]                           | The Elo rating of the shot-taker's team on the day of the match                                              |

**Table 1.** Overview of features included in expected goals models. The first 4 features are categorical features taking the values listed, the rest are numerical values in the ranges shown.
